# Supplementary material
Source: PubMed Central journal article supplement (PMC4428671)

Figure S1, related to Fig. 1

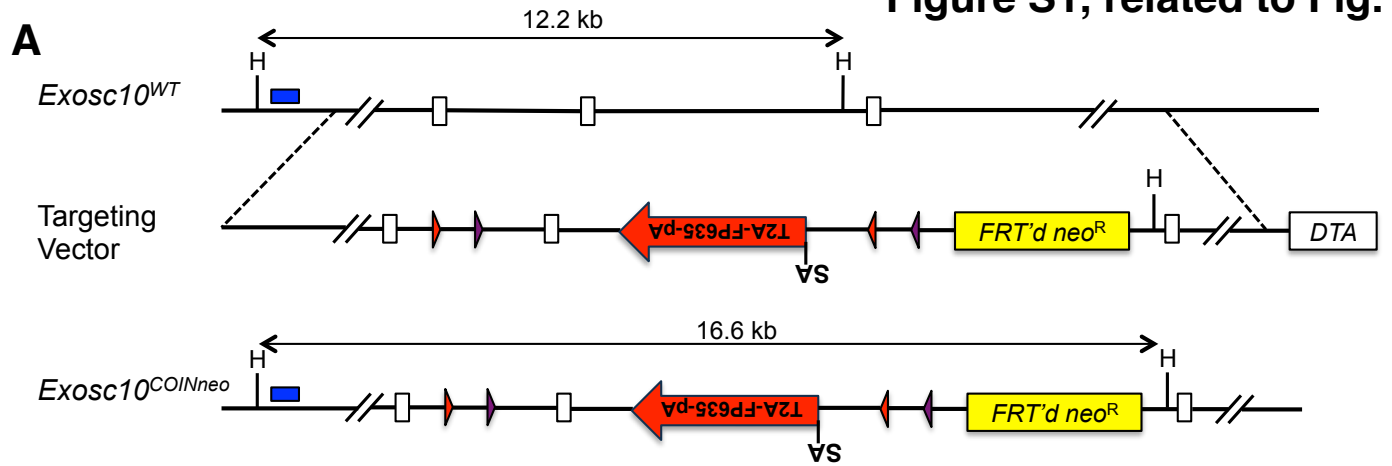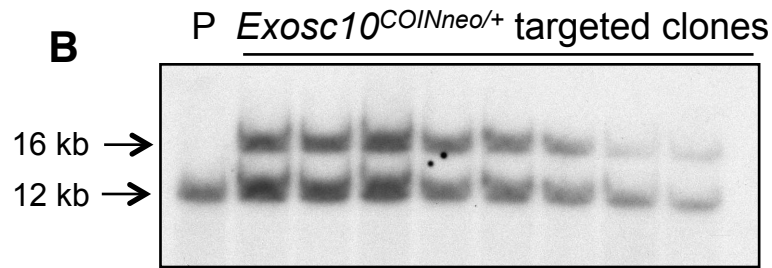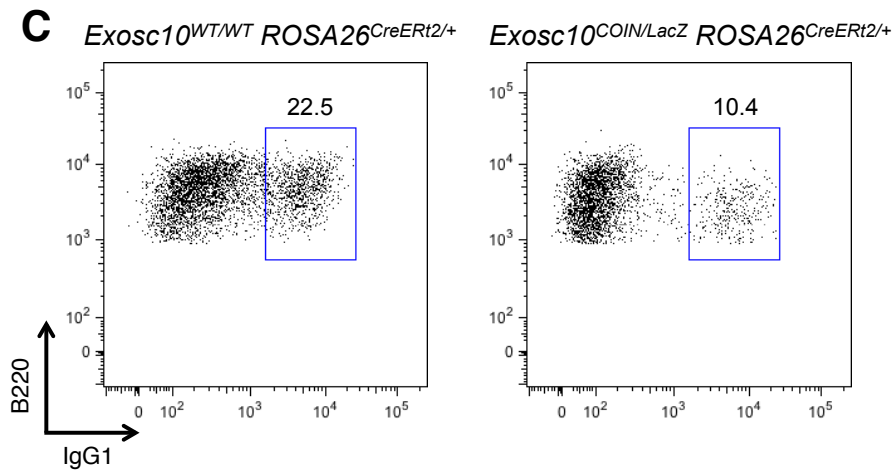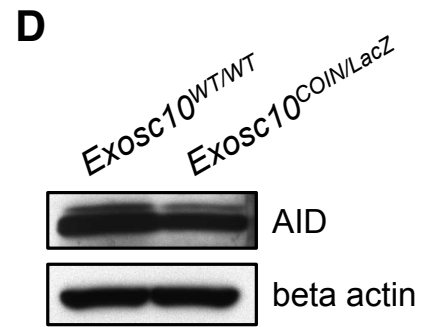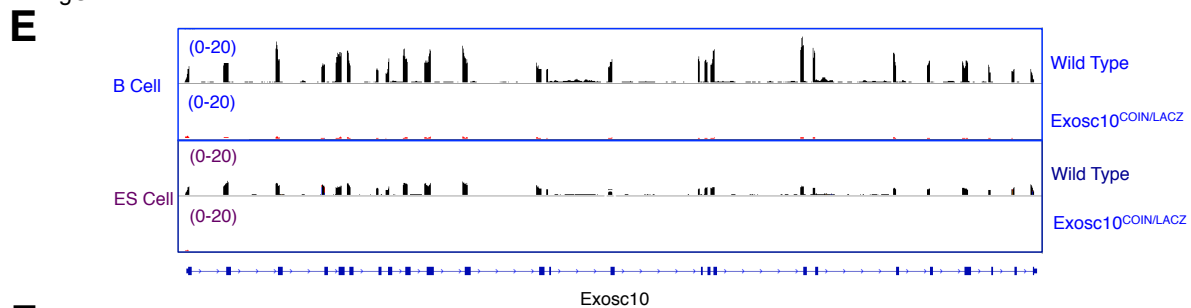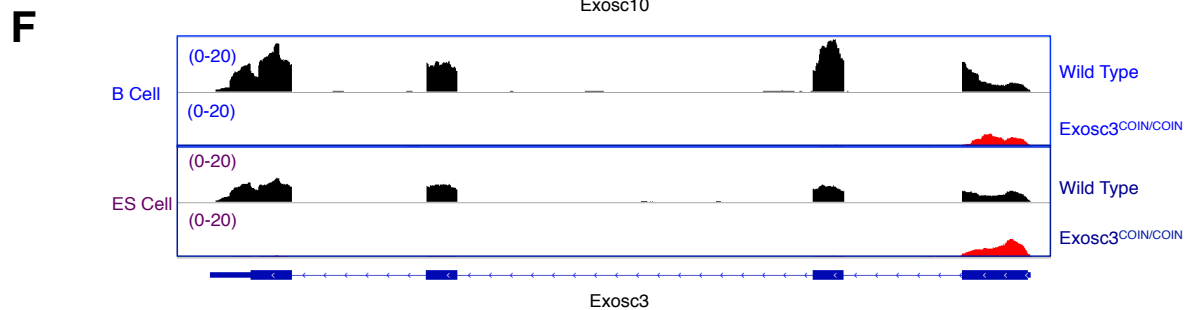

Supplement: NIHMS684099-supplement-01.pdf [file NIHMS684099-supplement-01.pdf]
